# Supplementary material for: Thermal Degradation of Photoluminescence Poly(9,9-dioctylfluorene) Solvent-Tuned Aggregate Films
Source: MDPI journal article supplement (doi:10.3390/polym14081615), 2022-04-15
Supplement: s1 [file s1]

## Supplementary Materials

### Thermal degradation of photoluminescence poly (9,9-dioctylfluorene) solvent-tuned aggregate films

Kang Wei Chew <sup>1</sup>, Nor Azura Abdul Rahim <sup>\*1</sup>, Pei Leng Teh <sup>1</sup>, Nurfatina Syafiqah Abdul Hisam <sup>1</sup> and Siti Salwa Alias <sup>2</sup>

<sup>1</sup>Faculty of Chemical Engineering Technology, Universiti Malaysia Perlis (UniMAP), Pusat Pengajian Jejawi 2, 02600 Arau, Perlis, Malaysia.

<sup>2</sup> Advanced Optical Materials Research Group (AOMRG), Department of Physics, Faculty of Science, Universiti Teknologi Malaysia (UTM), 81310 Skudai, Johor, Malaysia.

\*Correspondence: [norazura@unimap.edu.my](mailto:norazura@unimap.edu.my)

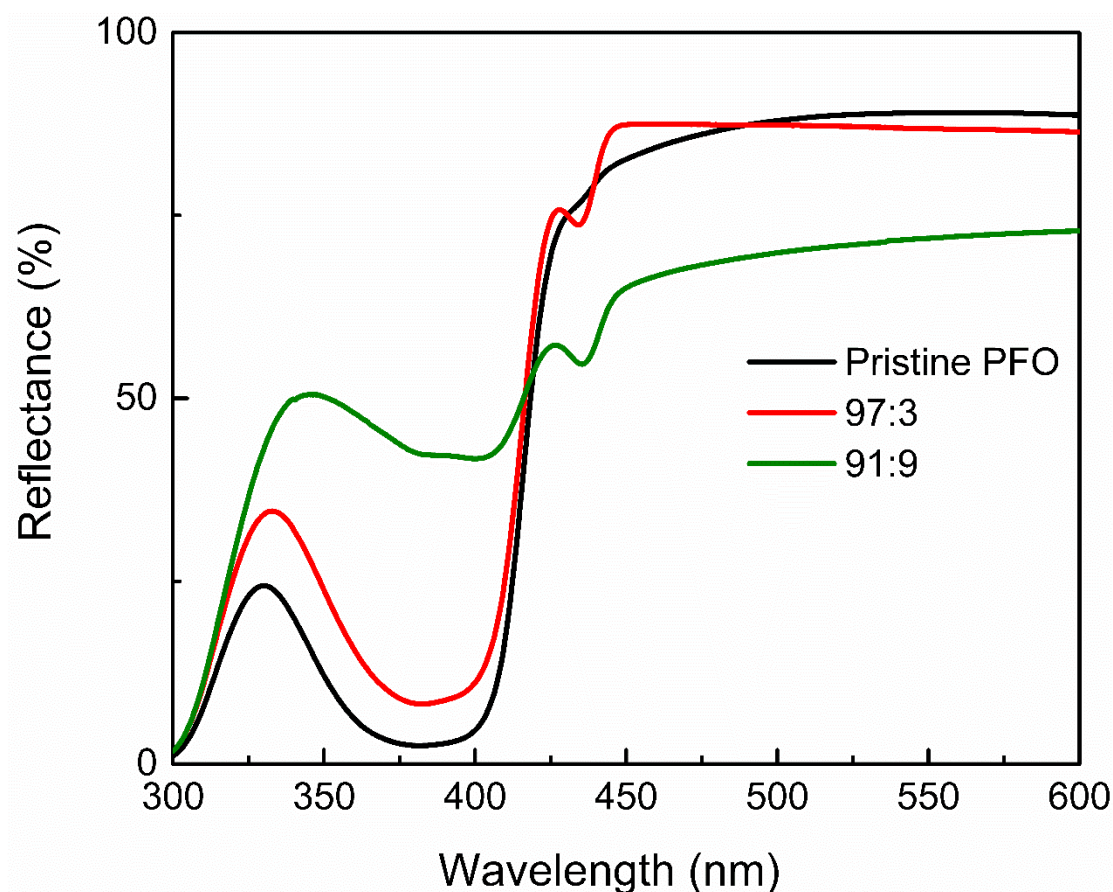

Figure S1: UV-Vis reflectance spectra of the PFO film and aggregated PFO films with 97:3 and 91:9 chloroform/methanol ratios.
